# Supplementary material
Source: publisher figshare collection journal article supplement (https://springernature.figshare.com/ndownloader/files/18037082)
Supplement: Supplementary file 1 [file 18037082]

## Sheet: Table S6
Table S6: TFBSs analysis of GhKNAT7 and GhMYB46 in the structural gene promoters of the lignin and cellulose biosynthesis pathway and GhTALE family gene promoters.
Gene ID	Gene name	Binding site name	position for promoters	strand	Binding site sequence	TF types	Arabidopsis thaliana Homologs ID
GhTALE family genes
Gh_A01G1715	GhBLH1-A01	TFmatrixID_0293/ K7-B1	94	-	tacTGTCAat	Homeodomain;TALE	AT1G62990;AT4G32040;AT5G11060;AT5G25220
Gh_A01G1715	GhBLH1-A01	TFmatrixID_0293/ K7-B1	903	+	aaTGACAgac	Homeodomain;TALE	AT1G62990;AT4G32040;AT5G11060;AT5G25220
Gh_A01G1895	GhBLH9-A01	TFmatrixID_0293/ K7-B1	1160	+	agTGACAgac	Homeodomain;TALE	AT1G62990;AT4G32040;AT5G11060;AT5G25220
Gh_A02G1546	GhBLH2-A02	TFmatrixID_0293/ K7-B1	502	+	aaTGACAgta	Homeodomain;TALE	AT1G62990;AT4G32040;AT5G11060;AT5G25220
Gh_A03G0158	GhBEL1-A03	TFmatrixID_0293/ K7-B1	116	+	gaTGACAgta	Homeodomain;TALE	AT1G62990;AT4G32040;AT5G11060;AT5G25220
Gh_A03G0158	GhBEL1-A03	TFmatrixID_0293/ K7-B1	855	-	tccTGTCAcc	Homeodomain;TALE	AT1G62990;AT4G32040;AT5G11060;AT5G25220
Gh_A03G2005	GhKNAT7-A03	TFmatrixID_0293/ K7-B1	109	+	agTGACAgct	Homeodomain;TALE	AT1G62990;AT4G32040;AT5G11060;AT5G25220
Gh_A05G0046	GhKNAT4-A05	TFmatrixID_0293/ K7-B1	470	-	cccTGTCAgc	Homeodomain;TALE	AT1G62990;AT4G32040;AT5G11060;AT5G25220
Gh_A05G0046	GhKNAT4-A05	TFmatrixID_0293/ K7-B1	881	+	aaTGACAgaa	Homeodomain;TALE	AT1G62990;AT4G32040;AT5G11060;AT5G25220
Gh_A05G0639	GhBLH5-A05	TFmatrixID_0293/ K7-B1	804	-	tgcTGTCAac	Homeodomain;TALE	AT1G62990;AT4G32040;AT5G11060;AT5G25220
Gh_A05G0912	GhBLH8-A05	TFmatrixID_0293/ K7-B1	211	+	aaTGACAgat	Homeodomain;TALE	AT1G62990;AT4G32040;AT5G11060;AT5G25220
Gh_A05G0912	GhBLH8-A05	TFmatrixID_0293/ K7-B1	876	-	tccTGTCAat	Homeodomain;TALE	AT1G62990;AT4G32040;AT5G11060;AT5G25220
Gh_A05G1484	GhSTM-A05	TFmatrixID_0293/ K7-B1	582	+	ctTGACAgcc	Homeodomain;TALE	AT1G62990;AT4G32040;AT5G11060;AT5G25220
Gh_A05G1484	GhSTM-A05	TFmatrixID_0293/ K7-B1	886	+	ttTGACAgtg	Homeodomain;TALE	AT1G62990;AT4G32040;AT5G11060;AT5G25220
Gh_A05G1633	GhBLH11-A05	TFmatrixID_0293/ K7-B1	9	+	agTGACAgaa	Homeodomain;TALE	AT1G62990;AT4G32040;AT5G11060;AT5G25220
Gh_A05G1633	GhBLH11-A05	TFmatrixID_0293/ K7-B1	1403	-	tgcTGTCAta	Homeodomain;TALE	AT1G62990;AT4G32040;AT5G11060;AT5G25220
Gh_A06G1844	GhBLH11-A06	TFmatrixID_0293/ K7-B1	300	+	aaTGACAgtg	Homeodomain;TALE	AT1G62990;AT4G32040;AT5G11060;AT5G25220
Gh_A06G1844	GhBLH11-A06	TFmatrixID_0293/ K7-B1	381	-	tgcTGTCAga	Homeodomain;TALE	AT1G62990;AT4G32040;AT5G11060;AT5G25220
Gh_A06G1844	GhBLH11-A06	TFmatrixID_0293/ K7-B1	995	-	accTGTCAat	Homeodomain;TALE	AT1G62990;AT4G32040;AT5G11060;AT5G25220
Gh_A07G0245	GhKNAT3-A07	TFmatrixID_0293/ K7-B1	977	-	atcTGTCAcc	Homeodomain;TALE	AT1G62990;AT4G32040;AT5G11060;AT5G25220
Gh_A07G1033	GhBLH5-A07	TFmatrixID_0293/ K7-B1	908	+	caTGACAgac	Homeodomain;TALE	AT1G62990;AT4G32040;AT5G11060;AT5G25220
Gh_A08G1004	GhBEL1-A08	TFmatrixID_0293/ K7-B1	370	-	agcTGTCAcc	Homeodomain;TALE	AT1G62990;AT4G32040;AT5G11060;AT5G25220
Gh_A10G0104	GhSTM-A10	TFmatrixID_0293/ K7-B1	251	-	cccTGTCAac	Homeodomain;TALE	AT1G62990;AT4G32040;AT5G11060;AT5G25220
Gh_A10G0104	GhSTM-A10	TFmatrixID_0293/ K7-B1	1297	-	cacTGTCAac	Homeodomain;TALE	AT1G62990;AT4G32040;AT5G11060;AT5G25220
Gh_A12G0390	GhBLH6-A12	TFmatrixID_0293/ K7-B1	888	-	ttcTGTCAtc	Homeodomain;TALE	AT1G62990;AT4G32040;AT5G11060;AT5G25220
Gh_A12G0390	GhBLH6-A12	TFmatrixID_0293/ K7-B1	1242	-	aacTGTCAac	Homeodomain;TALE	AT1G62990;AT4G32040;AT5G11060;AT5G25220
Gh_D01G1966	GhBLH1-D01	TFmatrixID_0293/ K7-B1	83	-	tacTGTCAat	Homeodomain;TALE	AT1G62990;AT4G32040;AT5G11060;AT5G25220
Gh_D01G1966	GhBLH1-D01	TFmatrixID_0293/ K7-B1	895	+	aaTGACAgac	Homeodomain;TALE	AT1G62990;AT4G32040;AT5G11060;AT5G25220
Gh_D01G2154	GhBLH9-D01	TFmatrixID_0293/ K7-B1	1185	+	agTGACAgac	Homeodomain;TALE	AT1G62990;AT4G32040;AT5G11060;AT5G25220
Gh_D02G1633	GhKNAT6-D02	TFmatrixID_0293/ K7-B1	1283	-	atcTGTCAtt	Homeodomain;TALE	AT1G62990;AT4G32040;AT5G11060;AT5G25220
Gh_D03G0175	GhBLH2-D03	TFmatrixID_0293/ K7-B1	644	-	ttcTGTCAaa	Homeodomain;TALE	AT1G62990;AT4G32040;AT5G11060;AT5G25220
Gh_D03G0175	GhBLH2-D03	TFmatrixID_0293/ K7-B1	998	-	tacTGTCAtt	Homeodomain;TALE	AT1G62990;AT4G32040;AT5G11060;AT5G25220
Gh_D03G1427	GhBEL1-D03	TFmatrixID_0293/ K7-B1	644	+	ggTGACAgga	Homeodomain;TALE	AT1G62990;AT4G32040;AT5G11060;AT5G25220
Gh_D03G1492	GhKNAT7-D03	TFmatrixID_0293/ K7-B1	1074	-	gtcTGTCAtt	Homeodomain;TALE	AT1G62990;AT4G32040;AT5G11060;AT5G25220
Gh_D03G1492	GhKNAT7-D03	TFmatrixID_0293/ K7-B1	1401	-	agcTGTCAct	Homeodomain;TALE	AT1G62990;AT4G32040;AT5G11060;AT5G25220
Gh_D04G0880	GhBLH1-D04	TFmatrixID_0293/ K7-B1	247	-	gtcTGTCAgt	Homeodomain;TALE	AT1G62990;AT4G32040;AT5G11060;AT5G25220
Gh_D05G0788	GhBLH5-D05	TFmatrixID_0293/ K7-B1	803	-	tgcTGTCAac	Homeodomain;TALE	AT1G62990;AT4G32040;AT5G11060;AT5G25220
Gh_D05G0993	GhBLH8-D05	TFmatrixID_0293/ K7-B1	213	+	aaTGACAgat	Homeodomain;TALE	AT1G62990;AT4G32040;AT5G11060;AT5G25220
Gh_D05G0993	GhBLH8-D05	TFmatrixID_0293/ K7-B1	875	-	tccTGTCAgt	Homeodomain;TALE	AT1G62990;AT4G32040;AT5G11060;AT5G25220
Gh_D05G1815	GhBLH11-D05	TFmatrixID_0293/ K7-B1	1	+	agTGACAgaa	Homeodomain;TALE	AT1G62990;AT4G32040;AT5G11060;AT5G25220
Gh_D05G1815	GhBLH11-D05	TFmatrixID_0293/ K7-B1	1394	-	tgcTGTCAta	Homeodomain;TALE	AT1G62990;AT4G32040;AT5G11060;AT5G25220
Gh_D06G0029	GhBLH11-D06	TFmatrixID_0293/ K7-B1	107	+	tgTGACAgaa	Homeodomain;TALE	AT1G62990;AT4G32040;AT5G11060;AT5G25220
Gh_D06G0029	GhBLH11-D06	TFmatrixID_0293/ K7-B1	318	+	aaTGACAgtg	Homeodomain;TALE	AT1G62990;AT4G32040;AT5G11060;AT5G25220
Gh_D06G0029	GhBLH11-D06	TFmatrixID_0293/ K7-B1	398	-	tgcTGTCAga	Homeodomain;TALE	AT1G62990;AT4G32040;AT5G11060;AT5G25220
Gh_D06G0029	GhBLH11-D06	TFmatrixID_0293/ K7-B1	1055	-	accTGTCAat	Homeodomain;TALE	AT1G62990;AT4G32040;AT5G11060;AT5G25220
Gh_D06G1066	GhKNAT3-D06	TFmatrixID_0293/ K7-B1	1302	+	atTGACAtgt	Homeodomain;TALE	AT1G62990;AT4G32040;AT5G11060;AT5G25220
Gh_D07G0302	GhKNAT3-D07	TFmatrixID_0293/ K7-B1	1001	-	accTGTCAcc	Homeodomain;TALE	AT1G62990;AT4G32040;AT5G11060;AT5G25220
Gh_D07G1112	GhBLH5-D07	TFmatrixID_0293/ K7-B1	892	+	caTGACAgac	Homeodomain;TALE	AT1G62990;AT4G32040;AT5G11060;AT5G25220
Gh_D10G0108	GhSTM-D10	TFmatrixID_0293/ K7-B1	646	+	atTGACAgtt	Homeodomain;TALE	AT1G62990;AT4G32040;AT5G11060;AT5G25220
Gh_D10G0108	GhSTM-D10	TFmatrixID_0293/ K7-B1	1297	-	cacTGTCAac	Homeodomain;TALE	AT1G62990;AT4G32040;AT5G11060;AT5G25220
Gh_D11G2813	GhKNAT2-D11	TFmatrixID_0293/ K7-B1	655	-	tacTGTCAta	Homeodomain;TALE	AT1G62990;AT4G32040;AT5G11060;AT5G25220
Gh_D12G0275	GhBLH6-D12	TFmatrixID_0293/ K7-B1	251	+	gtTGACAgtt	Homeodomain;TALE	AT1G62990;AT4G32040;AT5G11060;AT5G25220
Gh_D12G2227	GhKNAT7-D12	TFmatrixID_0293/ K7-B1	488	-	acaTGTCAaa	Homeodomain;TALE	AT1G62990;AT4G32040;AT5G11060;AT5G25220
Gh_D12G2573	GhKNATM-D12	TFmatrixID_0293/ K7-B1	799	-	cccTGTCAcc	Homeodomain;TALE	AT1G62990;AT4G32040;AT5G11060;AT5G25220
Gh_A02G0822	GhKNAT1-A02	TFmatrixID_0294/ K7-B2	1302	+	ctTGACAt	Homeodomain;TALE	AT1G62990
Gh_A05G1484	GhSTM-A05	TFmatrixID_0294/ K7-B2	1033	-	aTGTCAag	Homeodomain;TALE	AT1G62990
Gh_A10G2018	GhBLH9-A10	TFmatrixID_0294/ K7-B2	804	+	ctTGACAt	Homeodomain;TALE	AT1G62990
Gh_D05G1655	GhSTM-D05	TFmatrixID_0294/ K7-B2	1046	-	aTGTCAag	Homeodomain;TALE	AT1G62990
Gh_D11G1889	GhBLH2-D11	TFmatrixID_0294/ K7-B2	86	+	ctTGACAt	Homeodomain;TALE	AT1G62990
Gh_A01G1715	GhBLH1-A01	TFmatrixID_0588/ M46-B1	1442	-	aaACCTAcca	MYB	AT5G12870
Gh_A02G0822	GhKNAT1-A02	TFmatrixID_0588/ M46-B1	860	-	cgACCTAaca	MYB	AT5G12870
Gh_A03G1199	GhKNAT6-A03	TFmatrixID_0588/ M46-B1	957	-	atACCTAcct	MYB	AT5G12870
Gh_A04G0732	GhBLH9-A04	TFmatrixID_0588/ M46-B1	1482	-	aaACCTAaca	MYB	AT5G12870
Gh_A05G0046	GhKNAT4-A05	TFmatrixID_0588/ M46-B1	609	+	agtTAGGTga	MYB	AT5G12870
Gh_A06G0419	GhKNAT4-A06	TFmatrixID_0588/ M46-B1	826	+	ggcTAGGTta	MYB	AT5G12870
Gh_A09G0940	GhBLH5-A09	TFmatrixID_0588/ M46-B1	879	-	ttACCTAaca	MYB	AT5G12870
Gh_A10G2018	GhBLH9-A10	TFmatrixID_0588/ M46-B1	461	+	agcTAGGTct	MYB	AT5G12870
Gh_A11G2492	GhKNAT2-A11	TFmatrixID_0588/ M46-B1	442	+	aggTAGGTat	MYB	AT5G12870
Gh_A13G1595	GhKNAT3-A13	TFmatrixID_0588/ M46-B1	747	+	agaTAGGTca	MYB	AT5G12870
Gh_D01G1966	GhBLH1-D01	TFmatrixID_0588/ M46-B1	1401	-	aaACCTAcca	MYB	AT5G12870
Gh_D02G1633	GhKNAT6-D02	TFmatrixID_0588/ M46-B1	857	-	acACCTAcct	MYB	AT5G12870
Gh_D03G0175	GhBLH2-D03	TFmatrixID_0588/ M46-B1	749	-	ttACCTAact	MYB	AT5G12870
Gh_D04G0880	GhBLH1-D04	TFmatrixID_0588/ M46-B1	550	+	tggTAGGTtt	MYB	AT5G12870
Gh_D05G0099	GhKNAT4-D05	TFmatrixID_0588/ M46-B1	634	+	agtTAGGTga	MYB	AT5G12870
Gh_D06G0457	GhKNAT4-D06	TFmatrixID_0588/ M46-B1	836	+	ggcTAGGTta	MYB	AT5G12870
Gh_D09G0967	GhBLH5-D09	TFmatrixID_0588/ M46-B1	878	-	ttACCTAaca	MYB	AT5G12870
Gh_D10G2508	GhBLH9-D10	TFmatrixID_0588/ M46-B1	466	+	agcTAGGTct	MYB	AT5G12870
Gh_D11G1889	GhBLH2-D11	TFmatrixID_0588/ M46-B1	149	-	aaACCTAact	MYB	AT5G12870
Gh_D11G2813	GhKNAT2-D11	TFmatrixID_0588/ M46-B1	443	+	aggTAGGTat	MYB	AT5G12870
Gh_D12G0641	GhBLH2-D12	TFmatrixID_0588/ M46-B1	509	-	ttACCTAtca	MYB	AT5G12870
Gh_A01G1715	GhBLH1-A01	TFmatrixID_0589/ M46-B2	1286	+	agAACCAacc	MYB	AT5G12870
Gh_A01G1715	GhBLH1-A01	TFmatrixID_0589/ M46-B2	1290	+	ccAACCAcca	MYB	AT5G12870
Gh_A03G0158	GhBEL1-A03	TFmatrixID_0589/ M46-B2	597	+	ttAACCAcca	MYB	AT5G12870
Gh_A03G0158	GhBEL1-A03	TFmatrixID_0589/ M46-B2	947	-	tgtTGGTTat	MYB	AT5G12870
Gh_A03G2005	GhKNAT7-A03	TFmatrixID_0589/ M46-B2	250	-	ggaTGGTTgg	MYB	AT5G12870
Gh_A03G2005	GhKNAT7-A03	TFmatrixID_0589/ M46-B2	647	+	tcAACCAacc	MYB	AT5G12870
Gh_A04G0478	GhBLH1-A04	TFmatrixID_0589/ M46-B2	1404	+	agAACCAacc	MYB	AT5G12870
Gh_A05G0046	GhKNAT4-A05	TFmatrixID_0589/ M46-B2	1225	+	ttAACCAaca	MYB	AT5G12870
Gh_A05G0912	GhBLH8-A05	TFmatrixID_0589/ M46-B2	1180	+	agAACCAaca	MYB	AT5G12870
Gh_A05G1857	GhKNAT1-A05	TFmatrixID_0589/ M46-B2	461	-	gggTGGTTga	MYB	AT5G12870
Gh_A05G1857	GhKNAT1-A05	TFmatrixID_0589/ M46-B2	1384	-	ggtTGGTTgt	MYB	AT5G12870
Gh_A07G0245	GhKNAT3-A07	TFmatrixID_0589/ M46-B2	401	-	tggTGGTTta	MYB	AT5G12870
Gh_A07G1033	GhBLH5-A07	TFmatrixID_0589/ M46-B2	877	+	aaAACCAcca	MYB	AT5G12870
Gh_A08G1004	GhBEL1-A08	TFmatrixID_0589/ M46-B2	30	-	tggTGGTTtg	MYB	AT5G12870
Gh_A08G1820	GhKNAT2-A08	TFmatrixID_0589/ M46-B2	1269	+	ttAACCAaca	MYB	AT5G12870
Gh_A10G2018	GhBLH9-A10	TFmatrixID_0589/ M46-B2	1278	-	tgtTGGTTgg	MYB	AT5G12870
Gh_A12G2682	GhBEL1-A12	TFmatrixID_0589/ M46-B2	872	+	atAACCAaca	MYB	AT5G12870
Gh_A12G2682	GhBEL1-A12	TFmatrixID_0589/ M46-B2	1172	+	tgAACCAaca	MYB	AT5G12870
Gh_A13G0926	GhKNAT2-A13	TFmatrixID_0589/ M46-B2	821	-	cggTGGTTtt	MYB	AT5G12870
Gh_A13G2086	GhBLH7-A13	TFmatrixID_0589/ M46-B2	1395	-	tgtTGGTTat	MYB	AT5G12870
Gh_D01G1966	GhBLH1-D01	TFmatrixID_0589/ M46-B2	1245	+	agAACCAacc	MYB	AT5G12870
Gh_D01G1966	GhBLH1-D01	TFmatrixID_0589/ M46-B2	1249	+	ccAACCAcca	MYB	AT5G12870
Gh_D03G1427	GhBEL1-D03	TFmatrixID_0589/ M46-B2	552	+	atAACCAaca	MYB	AT5G12870
Gh_D03G1427	GhBEL1-D03	TFmatrixID_0589/ M46-B2	1320	-	tgtTGGTTgt	MYB	AT5G12870
Gh_D03G1492	GhKNAT7-D03	TFmatrixID_0589/ M46-B2	853	-	ggtTGGTTga	MYB	AT5G12870
Gh_D03G1492	GhKNAT7-D03	TFmatrixID_0589/ M46-B2	1260	+	ccAACCAtcc	MYB	AT5G12870
Gh_D04G0880	GhBLH1-D04	TFmatrixID_0589/ M46-B2	746	-	ggtTGGTTct	MYB	AT5G12870
Gh_D04G0880	GhBLH1-D04	TFmatrixID_0589/ M46-B2	1132	-	gagTGGTTgg	MYB	AT5G12870
Gh_D05G0099	GhKNAT4-D05	TFmatrixID_0589/ M46-B2	217	-	tggTGGTTga	MYB	AT5G12870
Gh_D05G0099	GhKNAT4-D05	TFmatrixID_0589/ M46-B2	1220	+	ttAACCAaca	MYB	AT5G12870
Gh_D05G0993	GhBLH8-D05	TFmatrixID_0589/ M46-B2	1192	+	agAACCAaca	MYB	AT5G12870
Gh_D05G2055	GhKNAT1-D05	TFmatrixID_0589/ M46-B2	470	-	gggTGGTTga	MYB	AT5G12870
Gh_D05G2055	GhKNAT1-D05	TFmatrixID_0589/ M46-B2	1138	-	ggtTGGTTgt	MYB	AT5G12870
Gh_D06G0225	GhKNAT1-D06	TFmatrixID_0589/ M46-B2	354	-	ggtTGGTTga	MYB	AT5G12870
Gh_D07G0302	GhKNAT3-D07	TFmatrixID_0589/ M46-B2	409	-	tggTGGTTta	MYB	AT5G12870
Gh_D07G1112	GhBLH5-D07	TFmatrixID_0589/ M46-B2	861	+	aaAACCAcca	MYB	AT5G12870
Gh_D08G2181	GhKNAT2-D08	TFmatrixID_0589/ M46-B2	263	+	acAACCActg	MYB	AT5G12870
Gh_D08G2181	GhKNAT2-D08	TFmatrixID_0589/ M46-B2	1269	+	tcAACCAaca	MYB	AT5G12870
Gh_D09G0967	GhBLH5-D09	TFmatrixID_0589/ M46-B2	242	+	aaAACCAcct	MYB	AT5G12870
Gh_D09G1263	GhBLH1-D09	TFmatrixID_0589/ M46-B2	971	-	ggtTGGTTat	MYB	AT5G12870
Gh_D10G2508	GhBLH9-D10	TFmatrixID_0589/ M46-B2	688	+	ccAACCAtct	MYB	AT5G12870
Gh_D10G2508	GhBLH9-D10	TFmatrixID_0589/ M46-B2	1227	-	tgtTGGTTgg	MYB	AT5G12870
Gh_D12G2283	GhBEL1-D12	TFmatrixID_0589/ M46-B2	191	-	tgtTGGTTca	MYB	AT5G12870
Gh_D12G2283	GhBEL1-D12	TFmatrixID_0589/ M46-B2	354	-	tgtTGGTTca	MYB	AT5G12870
Gh_D12G2283	GhBEL1-D12	TFmatrixID_0589/ M46-B2	653	-	tgtTGGTTat	MYB	AT5G12870
The structural genes of the lignin and cellulose biosynthesis pathway
Gh_A10G0456	4CL1	TFmatrixID_0293/ K7-B1	547	+	atTGACAtgt	Homeodomain;TALE	AT1G62990;AT4G32040;AT5G11060;AT5G25220
Gh_A08G0929	OMT	TFmatrixID_0293/ K7-B1	153	+	taTGACAggc	Homeodomain;TALE	AT1G62990;AT4G32040;AT5G11060;AT5G25220
Gh_A08G0929	OMT	TFmatrixID_0293/ K7-B1	310	+	gcTGACAgta	Homeodomain;TALE	AT1G62990;AT4G32040;AT5G11060;AT5G25220
Gh_D03G0457	CAD9	TFmatrixID_0293/ K7-B1	1731	-	agaTGTCAaa	Homeodomain;TALE	AT1G62990;AT4G32040;AT5G11060;AT5G25220
Gh_D10G1174	HST	TFmatrixID_0293/ K7-B1	431	-	tacTGTCAcc	Homeodomain;TALE	AT1G62990;AT4G32040;AT5G11060;AT5G25220
Gh_D10G1172	HST	TFmatrixID_0293/ K7-B1	1421	-	acaTGTCAat	Homeodomain;TALE	AT1G62990;AT4G32040;AT5G11060;AT5G25220
Gh_D08G1135	OMT	TFmatrixID_0293/ K7-B1	186	+	taTGACAggc	Homeodomain;TALE	AT1G62990;AT4G32040;AT5G11060;AT5G25220
Gh_D08G1135	OMT	TFmatrixID_0293/ K7-B1	343	+	gcTGACAgta	Homeodomain;TALE	AT1G62990;AT4G32040;AT5G11060;AT5G25220
Gh_D08G0509	CESA4	TFmatrixID_0293/ K7-B1	164	+	tgTGACAtgt	Homeodomain;TALE	AT1G62990;AT4G32040;AT5G11060;AT5G25220
Gh_D08G0509	CESA4	TFmatrixID_0293/ K7-B1	673	+	ttTGACAgtt	Homeodomain;TALE	AT1G62990;AT4G32040;AT5G11060;AT5G25220
Gh_A08G0421	CESA4	TFmatrixID_0293/ K7-B1	68	+	agTGACAtgt	Homeodomain;TALE	AT1G62990;AT4G32040;AT5G11060;AT5G25220
Gh_A12G0193	CAD1	TFmatrixID_0293/ K7-B1	296	-	ttcTGTCAtt	Homeodomain;TALE	AT1G62990;AT4G32040;AT5G11060;AT5G25220
Gh_A02G1320	CAD9	TFmatrixID_0293/ K7-B1	1720	-	agaTGTCAaa	Homeodomain;TALE	AT1G62990;AT4G32040;AT5G11060;AT5G25220
Gh_A07G1871	CESA4	TFmatrixID_0293/ K7-B1	751	+	aaTGACAgca	Homeodomain;TALE	AT1G62990;AT4G32040;AT5G11060;AT5G25220
Gh_D12G0195	CAD1	TFmatrixID_0293/ K7-B1	181	-	ttcTGTCAtt	Homeodomain;TALE	AT1G62990;AT4G32040;AT5G11060;AT5G25220
Gh_D10G1172	HST	TFmatrixID_0294/ K7-B2	940	+	ctTGACAt	Homeodomain;TALE	AT1G62990
Gh_A12G0193	CAD1	TFmatrixID_0294/ K7-B2	239	-	aTGTCAag	Homeodomain;TALE	AT1G62990
Gh_A10G0327	CESA8	TFmatrixID_0294/ K7-B2	1012	+	ctTGACAt	Homeodomain;TALE	AT1G62990
Gh_D10G0333	CESA8	TFmatrixID_0294/ K7-B2	1027	+	ctTGACAt	Homeodomain;TALE	AT1G62990
Gh_D06G1762	LAC5	TFmatrixID_0294/ K7-B2	1137	-	aTGTCAag	Homeodomain;TALE	AT1G62990
Gh_D05G0079	CESA7	TFmatrixID_0588/ M46-B1	643	-	ttACCTAacg	MYB	AT5G12870
Gh_A10G0456	4CL1	TFmatrixID_0588/ M46-B1	881	+	cgcTAGGTga	MYB	AT5G12870
Gh_A10G0456	4CL1	TFmatrixID_0588/ M46-B1	936	+	tggTAGGTaa	MYB	AT5G12870
Gh_A12G2227	OMT	TFmatrixID_0588/ M46-B1	1890	+	aggTAGGTaa	MYB	AT5G12870
Gh_A05G1005	HST	TFmatrixID_0588/ M46-B1	1137	+	tgtTAGGTtt	MYB	AT5G12870
Gh_A05G1005	HST	TFmatrixID_0588/ M46-B1	1938	+	agcTAGGTgg	MYB	AT5G12870
Gh_D04G1586	CCOAOMT1	TFmatrixID_0588/ M46-B1	319	+	tggTAGGTcg	MYB	AT5G12870
Gh_D10G0473	4CL1	TFmatrixID_0588/ M46-B1	977	+	tggTAGGTaa	MYB	AT5G12870
Gh_D08G0509	CESA4	TFmatrixID_0588/ M46-B1	1107	-	atACCTAgca	MYB	AT5G12870
Gh_D12G2714	OMT	TFmatrixID_0588/ M46-B1	1824	+	aggTAGGTaa	MYB	AT5G12870
Gh_A11G1616	AN3	TFmatrixID_0588/ M46-B1	1058	+	cgtTAGGTga	MYB	AT5G12870
Gh_D07G0380	CESA7	TFmatrixID_0588/ M46-B1	1808	+	tggTAGGTgg	MYB	AT5G12870
Gh_A12G0193	CAD1	TFmatrixID_0588/ M46-B1	251	-	taACCTAact	MYB	AT5G12870
Gh_A05G3965	CESA7	TFmatrixID_0588/ M46-B1	642	-	ttACCTAacg	MYB	AT5G12870
Gh_D01G2080	PAL	TFmatrixID_0588/ M46-B1	1876	-	ttACCTAccc	MYB	AT5G12870
Gh_D05G1123	HST	TFmatrixID_0588/ M46-B1	1938	+	agcTAGGTgg	MYB	AT5G12870
Gh_D11G1775	F3H	TFmatrixID_0588/ M46-B1	465	+	tgaTAGGTtt	MYB	AT5G12870
Gh_D11G1775	F3H	TFmatrixID_0588/ M46-B1	1110	+	cgtTAGGTga	MYB	AT5G12870
Gh_A01G1839	PAL	TFmatrixID_0588/ M46-B1	1876	-	ttACCTAccc	MYB	AT5G12870
Gh_A04G1032	CCOAOMT1	TFmatrixID_0588/ M46-B1	961	+	tgaTAGGTcg	MYB	AT5G12870
Gh_D10G0333	CESA8	TFmatrixID_0588/ M46-B1	1738	-	caACCTAccc	MYB	AT5G12870
Gh_D06G1762	LAC5	TFmatrixID_0588/ M46-B1	442	-	ccACCTAaca	MYB	AT5G12870
Gh_D12G0195	CAD1	TFmatrixID_0588/ M46-B1	136	-	taACCTAact	MYB	AT5G12870
Gh_A08G0929	OMT	TFmatrixID_0589/ M46-B2	141	-	ggtTGGTTca	MYB	AT5G12870
Gh_A08G0929	OMT	TFmatrixID_0589/ M46-B2	437	-	agtTGGTTat	MYB	AT5G12870
Gh_A08G0929	OMT	TFmatrixID_0589/ M46-B2	606	-	tgcTGGTTgt	MYB	AT5G12870
Gh_A05G1005	HST	TFmatrixID_0589/ M46-B2	1020	-	ggtTGGTTgt	MYB	AT5G12870
Gh_D08G1135	OMT	TFmatrixID_0589/ M46-B2	174	-	ggtTGGTTca	MYB	AT5G12870
Gh_D08G1135	OMT	TFmatrixID_0589/ M46-B2	470	-	aggTGGTTat	MYB	AT5G12870
Gh_D08G0509	CESA4	TFmatrixID_0589/ M46-B2	510	-	tggTGGTTtt	MYB	AT5G12870
Gh_D08G0509	CESA4	TFmatrixID_0589/ M46-B2	1470	+	tcAACCAtcg	MYB	AT5G12870
Gh_A11G1616	AN3	TFmatrixID_0589/ M46-B2	227	+	cgAACCAaca	MYB	AT5G12870
Gh_D07G0380	CESA7	TFmatrixID_0589/ M46-B2	274	+	tcAACCAcca	MYB	AT5G12870
Gh_D07G0380	CESA7	TFmatrixID_0589/ M46-B2	1678	-	ggtTGGTTat	MYB	AT5G12870
Gh_D07G0380	CESA7	TFmatrixID_0589/ M46-B2	1865	+	gcAACCAtcg	MYB	AT5G12870
Gh_A12G0193	CAD1	TFmatrixID_0589/ M46-B2	1249	+	agAACCAccc	MYB	AT5G12870
Gh_D01G2080	PAL	TFmatrixID_0589/ M46-B2	12	-	agtTGGTTgg	MYB	AT5G12870
Gh_D01G2080	PAL	TFmatrixID_0589/ M46-B2	1827	+	cgAACCAacg	MYB	AT5G12870
Gh_D01G2080	PAL	TFmatrixID_0589/ M46-B2	1855	+	tcAACCAaca	MYB	AT5G12870
Gh_A10G0327	CESA8	TFmatrixID_0589/ M46-B2	618	-	tgtTGGTTat	MYB	AT5G12870
Gh_D05G1123	HST	TFmatrixID_0589/ M46-B2	1067	-	ggtTGGTTgt	MYB	AT5G12870
Gh_D11G1775	F3H	TFmatrixID_0589/ M46-B2	415	-	cggTGGTTgt	MYB	AT5G12870
Gh_A01G1839	PAL	TFmatrixID_0589/ M46-B2	1855	+	tcAACCAaca	MYB	AT5G12870
Gh_A07G1871	CESA4	TFmatrixID_0589/ M46-B2	1361	+	ttAACCAacc	MYB	AT5G12870
Gh_A07G1871	CESA4	TFmatrixID_0589/ M46-B2	1365	+	ccAACCAacc	MYB	AT5G12870
Gh_A07G1871	CESA4	TFmatrixID_0589/ M46-B2	1595	-	ggtTGGTTaa	MYB	AT5G12870
SCW-related BEL1-Like members
SCW-related KNOX members
Lignin biosynthesis genes
cellulose biosynthesis genes
